# Supplementary material for: State of household need for caregivers and determinants of psychological burden among caregivers of older people in Thailand: An analysis from national surveys on older persons
Source: PLOS journal article supplement (doi:10.1371/journal.pone.0226330), 2019-12-11
Supplement: S1 (10.1371/journal.pone.0226330.s001) [file journal.pone.0226330.s001]

# Mental Health Survey (Self administered) (Ask older person aged 60 and over and care giver)

|                      |                      |                      |                      |                      |                      |                      |                      |                      |                      |
|----------------------|----------------------|----------------------|----------------------|----------------------|----------------------|----------------------|----------------------|----------------------|----------------------|
| REG                  | CWT                  | AMP                  | TMB                  | AREA                 | ED                   | BLK_VIL              | PSU_NO               | MONTH_YR             | HH_NO                |
| <input type="text"/> | <input type="text"/> | <input type="text"/> | <input type="text"/> | <input type="text"/> | <input type="text"/> | <input type="text"/> | <input type="text"/> | <input type="text"/> | <input type="text"/> |
| 1                    | 4                    | 8                    | 9                    | 12                   | 14                   | 18                   | 22                   |                      |                      |

The following questions concern your psychological experiences during past month

Record code "1 - 4" in  according to your opinion or feeling.

No = 1 A little = 2 Much = 3 Very much = 4

REC\_NO  34

- For persons aged 60 and over, record line no. and name from questionnaire SPS.54 (Long form) into A1 and A2
- For care giver, record line no. and name of the person whom the caregiver take care of and check "X" in "CG"

- You are satisfied with your life .....
- You feel relaxed/at ease.....
- You feel bored with your daily life .....
- You feel disappointed in yourself .....
- You feel that your life is unhappy.....
- You can accept a bad situation that is hard to be solved (when a problem occurs).....
- You are confident you can control yourself when something bad or serious happens.....
- You are confident you can face bad situations in your life .....
- You feel sympathy when seeing someone in trouble .....
- You feel happy when helping someone in trouble .....
- You help people when you have a chance .....
- You feel proud of yourself .....
- You feel secure and safe with your family .....
- You believe that your family will take good care of you when you are seriously ill .....
- Your family members love and care for each other.....

|     |           |                      |                      |                      |                      |
|-----|-----------|----------------------|----------------------|----------------------|----------------------|
| A1  | 32        | <input type="text"/> | <input type="text"/> | <input type="text"/> | <input type="text"/> |
| A2  | name..... | name.....            | name.....            | name.....            |                      |
| CG  | 35        | <input type="text"/> | <input type="text"/> | <input type="text"/> | <input type="text"/> |
| M01 | 36        | <input type="text"/> | <input type="text"/> | <input type="text"/> | <input type="text"/> |
| M02 | 37        | <input type="text"/> | <input type="text"/> | <input type="text"/> | <input type="text"/> |
| M03 | 38        | <input type="text"/> | <input type="text"/> | <input type="text"/> | <input type="text"/> |
| M04 | 39        | <input type="text"/> | <input type="text"/> | <input type="text"/> | <input type="text"/> |
| M05 | 40        | <input type="text"/> | <input type="text"/> | <input type="text"/> | <input type="text"/> |
| M06 | 41        | <input type="text"/> | <input type="text"/> | <input type="text"/> | <input type="text"/> |
| M07 | 42        | <input type="text"/> | <input type="text"/> | <input type="text"/> | <input type="text"/> |
| M08 | 43        | <input type="text"/> | <input type="text"/> | <input type="text"/> | <input type="text"/> |
| M09 | 44        | <input type="text"/> | <input type="text"/> | <input type="text"/> | <input type="text"/> |
| M10 | 45        | <input type="text"/> | <input type="text"/> | <input type="text"/> | <input type="text"/> |
| M11 | 46        | <input type="text"/> | <input type="text"/> | <input type="text"/> | <input type="text"/> |
| M12 | 47        | <input type="text"/> | <input type="text"/> | <input type="text"/> | <input type="text"/> |
| M13 | 48        | <input type="text"/> | <input type="text"/> | <input type="text"/> | <input type="text"/> |
| M14 | 49        | <input type="text"/> | <input type="text"/> | <input type="text"/> | <input type="text"/> |
| M15 | 50        | <input type="text"/> | <input type="text"/> | <input type="text"/> | <input type="text"/> |
